# Supplementary material for: A ratiometric fluorescent composite nanomaterial for RNA detection based on graphene quantum dots and molecular probes
Source: Royal Society of Chemistry journal article supplement (doi:10.1039/c8tb01125g), 2018-01-01
Supplement: c8tb01125g1.pdf [file c8tb01125g1.pdf]

*Supporting information for*

**A ratiometric fluorescent composite nanomaterial for RNA detection  
based on graphene quantum dots and molecular probe**

Guanghan Li, Yong Liu , Jie Niu , Meishan Pei \*, Weiying Lin \*

Institute of Fluorescent Probes for Biological Imaging, School of Chemistry and Chemical Engineering, School of Materials Science and Engineering, University of Jinan, Jinan, Shandong 250022, P. R. China.

Email: [weiyinglin2013@163.com](mailto:weiyinglin2013@163.com); [chm\\_peims@ujn.edu.cn](mailto:chm_peims@ujn.edu.cn)

## Table of contents

|                  | Page |
|------------------|------|
| Figure S1. ....  | S3   |
| Figure S2. ....  | S3   |
| Figure S3. ....  | S4   |
| Figure S4. ....  | S4   |
| Figure S5. ....  | S4   |
| References ..... | S5   |

### Calculation of RNA concentration<sup>1</sup>

RNA concentration was calculated by bellow equation. The ultraviolet absorption intensity standed for size of the electron energy level transition probability and abide by the lambert beer's law (1).

$$A = -\log \frac{I}{I_0} = \varepsilon cl \quad (1)$$

A is absorbancy;  $\varepsilon$  is extinction coefficient, extinction coefficient of RNA is 7700; c is molar concentration; l is length of sample pool;  $I_0$  and I stand for the intensity of the incident light and transmission light, respectively.

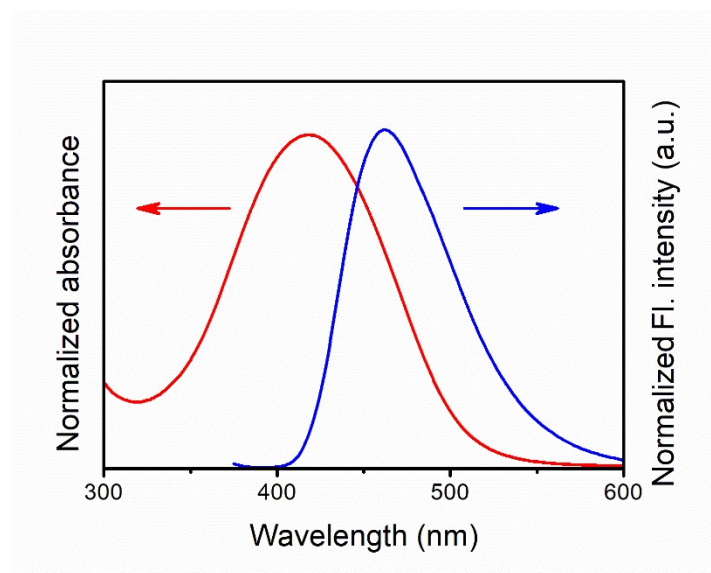

**Figure S1.** The overlap between the normalized excitation spectrum of HVC-6 and the normalized emission spectrum of QDs ( $\lambda_{ex} = 365$  nm).

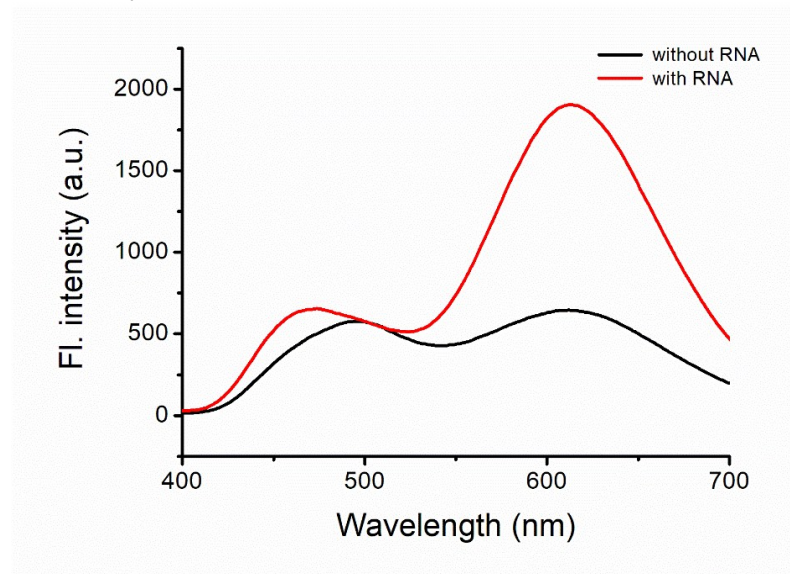

**Figure S2.** Fluorescence emission spectra of HVC-6@GQDs with and without RNA (100  $\mu$ M),  $\lambda_{\text{ex}}$  = 365 nm.

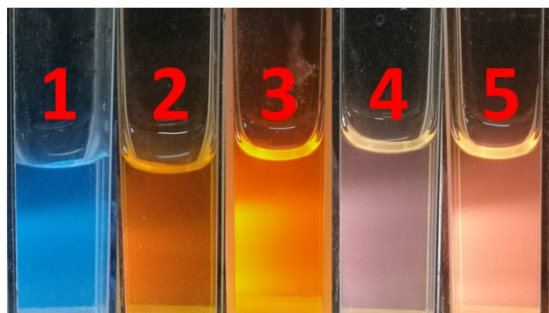

**Figure S3.** Visual fluorescence emission color changes of GQDs (1), HVC-6 (2), HVC-6 with RNA (3), HVC-6@GQDs (4) and HVC-6@GQDs with RNA (5),  $\lambda_{\text{ex}}$  = 365 nm.

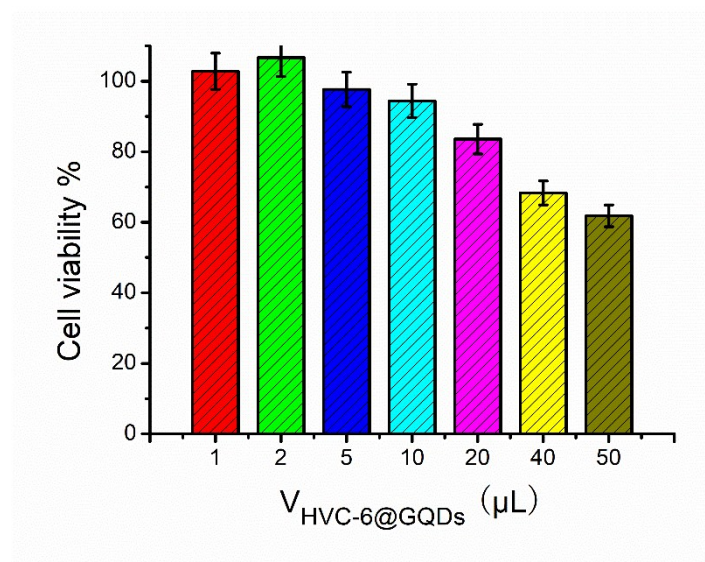

**Figure S4.** Viability of the HeLa cells treated with HVC-6@GQDs stock solution at varying volume (0-50  $\mu$ L).

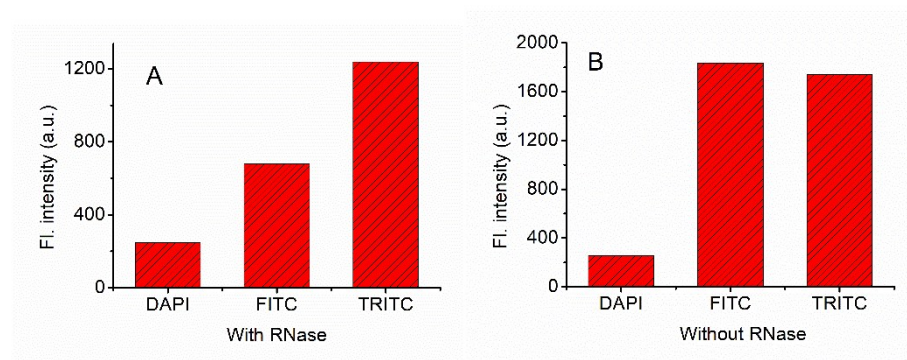

**Figure S5.** (A) Mean fluorescence intensity of each channel of fixed HeLa cells pre-treated with RNase. (B) Mean fluorescence intensity of each channel of fixed HeLa cells pre-treated without RNase.

## References

1. G. Song, Y. Sun, Y. Liu, X. Wang, M. Chen, F. Miao, W. Zhang, X. Yu and J. Jin, *Biomaterials*, 2014, 35, 2103.
